# Supplementary material for: Self-assembled Mn3O4 nano-clusters over carbon nanotube threads with enhanced supercapacitor performance
Source: Royal Society of Chemistry journal article supplement (doi:10.1039/c8nj04850a), 2018-01-01
Supplement: c8nj04850a1.pdf [file c8nj04850a1.pdf]

Supporting Information

## Self-assembled Mn<sub>3</sub>O<sub>4</sub> nano-clusters over carbon nanotube threads with enhanced supercapacitor performance

Vishwanath Hiremath<sup>1</sup>, Min cho<sup>2,\*</sup> and Jeong Gil Seo<sup>1,\*</sup>

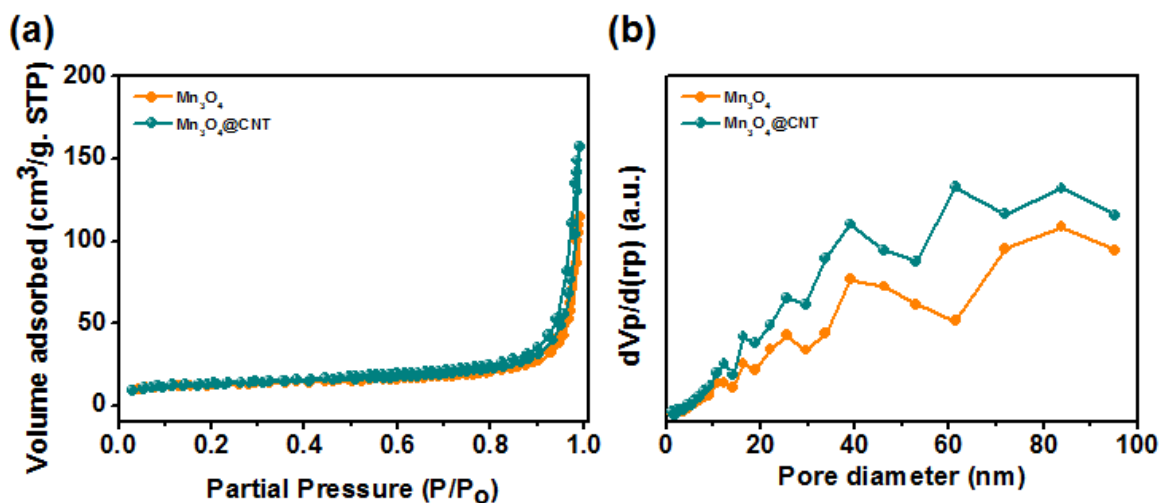

Fig. S1 Textural properties of Mn<sub>3</sub>O<sub>4</sub> and Mn<sub>3</sub>O<sub>4</sub>@CNT (a) N<sub>2</sub> adsorption-desorption isotherms, (b) Pore size distribution curves.

Table S1 Summary of textural properties of Mn<sub>3</sub>O<sub>4</sub> and Mn<sub>3</sub>O<sub>4</sub>@CNT nano-clusters.

| Sample                              | Crystallite size (nm) | Specific surface area (m <sup>2</sup> /g) | Total pore volume (cm <sup>3</sup> /g) | Average pore diameter (nm) |
|-------------------------------------|-----------------------|-------------------------------------------|----------------------------------------|----------------------------|
| Mn <sub>3</sub> O <sub>4</sub>      | 35.6                  | 44                                        | 0.17                                   | 15.6                       |
| Mn <sub>3</sub> O <sub>4</sub> @CNT | 36.9                  | 45                                        | 0.23                                   | 20.8                       |

<sup>1</sup>Department of Energy Science and Technology, Myongji University,  
116Myongji-ro, Cheoin-gu, Yongin, Gyeonggi-do 17058, Republic of Korea  
E-mail: [jaseo@mju.ac.kr](mailto:jaseo@mju.ac.kr)

<sup>2</sup>Division of Biotechnology, Safety, Environment and Life Science Institute, College  
of Environmental and Bioresource Sciences, Chonbuk National University, Iksan  
570-752, Republic of Korea  
E-mail: [cho317@jbnu.ac.kr](mailto:cho317@jbnu.ac.kr)

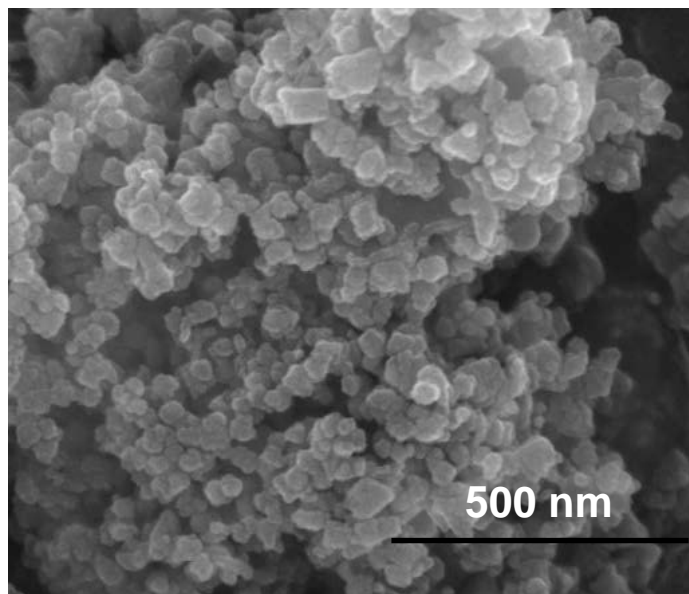

Fig. S2 FE-SEM images for Mn<sub>3</sub>O<sub>4</sub> nanoclusters

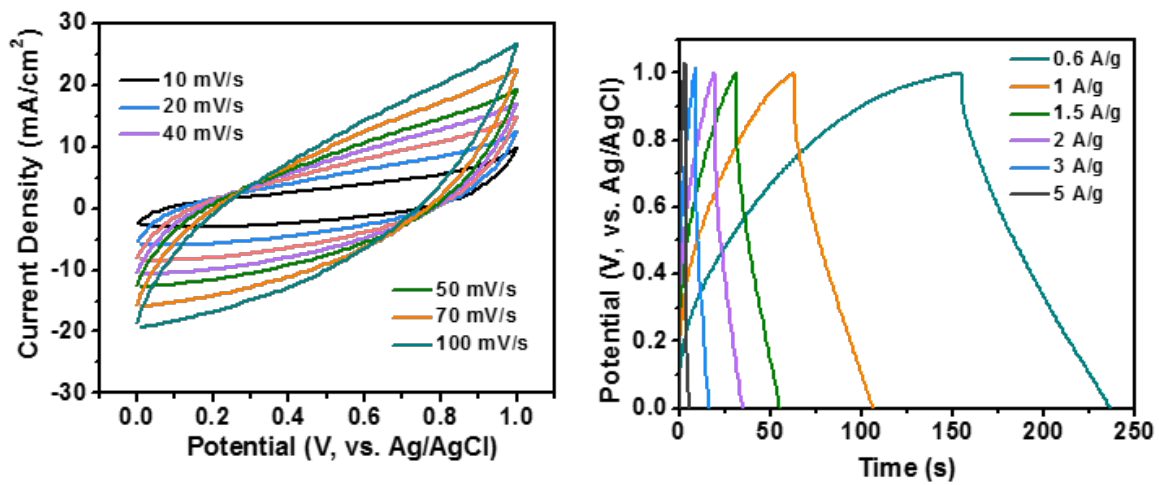

Fig. S3 (a) Cyclic voltamograms of pristine Mn<sub>3</sub>O<sub>4</sub> nanoparticles electrode at different scan rates, (b) galvanostatic charge-discharge curves of pristine Mn<sub>3</sub>O<sub>4</sub> nanoparticles at different potential

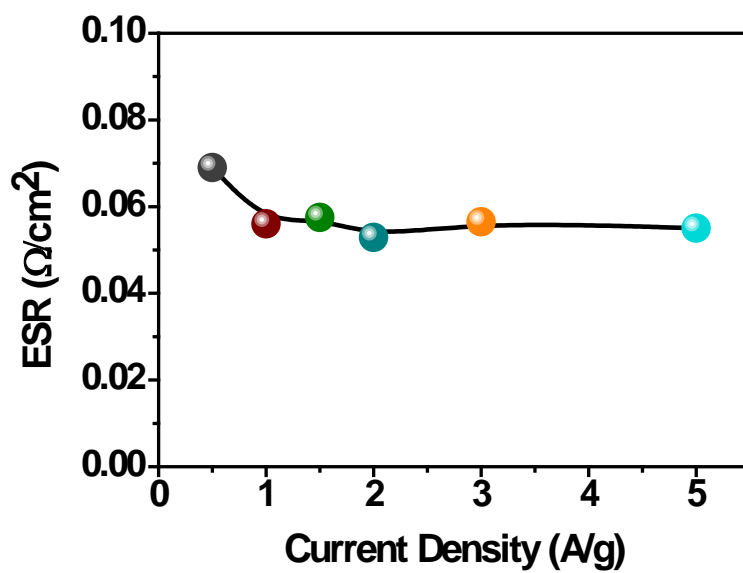

Fig. S4 calculated ESR for Mn<sub>3</sub>O<sub>4</sub>@CNT at different current densities.
